# Supplementary material for: First assessment of potential distribution and dispersal capacity of the emerging invasive mosquito Aedes koreicus in Northeast Italy
Source: PubMed Central journal article supplement (PMC4739402; doi:10.1186/s13071-016-1340-9), 2016-02-03
Supplement: 13071_2016_1340_MOESM1_ESM.pdf [file 13071_2016_1340_MOESM1_ESM.pdf]

```
#####
# Copyright (C), 2015-2016 Matteo Marcantonio
#
# This program is free software; you can redistribute it and/or modify it under
# the terms of the GNU General Public License as published by the Free Software
# Foundation; either version 2 of the License, or (at your option) any later version.
#
# This program is distributed in the hope that it will be useful, but WITHOUT
# ANY WARRANTY; without even the implied warranty of MERCHANTABILITY or FITNESS
# FOR A PARTICULAR PURPOSE. See the GNU General Public License for more details.
#
# A copy of the GNU General Public License is available at
# http://www.gnu.org/licenses/gpl.txt, or can be requested to the Free Software
# Foundation, Inc., 51 Franklin Street, Fifth
# Floor, Boston, MA 02110-1301 USA
#
#####
```

R function logBay for logistic regression with Bayesian Inference

#### Description:

The function 'logBay' performs logistic regression with Bayesian inference. Currently only simple logistic regressions (no hierarchical structure) with continuous predictor variables are supported.

#### Usage:

```
BayesOutput<-logBayes(priorList, respDistr="dbern", inData, orData, numChains, burnIn,
numIters, thinVal, backtrans, interaction, posterior, plot)
```

#### Arguments:

priorList: a list of character vectors containing priors mean, precision (1/sd) and a parameters defining truncated half distribution (optional).

respDistr: distribution family of the response. Currently only "dbern" is supported

inData: input list with response and predictor variables and a numeric vector with the total number of observations. The latter must be called "N". The response variable column must be named "y"

orData: if the predictor variables in 'inData' are scaled (centred and scaled), 'orData' is specified as the original input list with the same structure of inData and backtrans=TRUE, the model coefficients are transformed in original scale units. Optional.

numChains,burnIn,numIters,thinVal: see ?jags.model for information on these options.

interaction: a character vector of length 2 adding an interaction term. The vector must contain the name of the two interacting variables (e.g., c("x1","x2")). If no interactions are included in the model, it must be set as FALSE. A prior with mean=0 and precision=1e-12 is automatically assigned to the interaction term.

backtrans: if set as TRUE, the model coefficients are back-transformed to the original scale (if the predictor variables are scaled and an orData is provided).

posterior: if TRUE, the posterior distributions are sampled and saved in a list, otherwise only the DIC is calculated and saved.

plot: if TRUE, the posterior distribution of the model coefficients are plotted.

#### Depends:

coda and rjags package

Value:

a list with the MCMC chains for each model coefficient and the DIC object.

Author:

Matteo Marcantonio

Example:

```
# Synthetic predictors; x1,x2 correlated, x3 independent;
require(MASS)
set.seed(111)
N<-50
M<-matrix(c(-0.7,-0.7,0),3,3) # correlation matrix
diag(M)<-1
X<-mvrnorm(N,c(0,2,0),M,empirical=TRUE)
x1 = X[, 1]
x2 = X[, 2]
x3 = X[, 3]
# y is a linear combination of this three variables
z = 1 + x1 + 2*x2 + 5*x3 # linear combination with a bias
pr = 1/(1+exp(-z)) # pass through an inv-logit function
y = rbinom(N,1,pr) # Bernoulli distr. response variable

# Build the input list
JAGSData <- list(
  y = y,
  x1 = x1,
  x2 = x2,
  x3 = x3,
  N = N)

# Scale the predictors
JAGSData_scaled <- list(
  y = y,
  x1 = as.integer(scale(x1)),
  x2 = as.integer(scale(x2)),
  x3 = as.integer(scale(x3)),
  N = N)

# Define the priors
modelTerm <- list(
  alpha = c(0,1.0E-12,""),
  x1 = c(1.962, 1.5290519881,"I(0, 1.0E8)"),
  x2 = c(0, 1.0E-12,""),
  x3 = c(0, 1.0E-12,"")
)

# Run the function without interactions
BayesOutput<-logBayes(priorList=modelTerm, respDistr="dbern", inData=JAGSData_scaled,
orData=JAGSData, numChains=4, burnIn=1000, numIters=1000, thinVal=1, backtrans=FALSE,
interaction=FALSE, posterior=TRUE, plot=TRUE)
```

```

# Run the function with an interaction term
BayesOutput<-logBayes(priorList=modelTerm, respDistr="dbern", inData=JAGSData_scaled,
orData=JAGSData, numChains=4, burnIn=10000, numIters=10000, thinVal=1, backtrans=FALSE,
interaction=c("x2","x3"), posterior=TRUE, plot=TRUE)

# Look at the PPD
summary(BayesOutput[[1]])
plot(BayesOutput[[1]],ask=T)

# Check for convergence
gelman.diag(BayesOutput[[1]])

## Function code
logBayes<-function(priorList, respDistr, modelFile = tempfile(), inData, orData, numChains,
burnIn, numIters, thinVal, interaction=FALSE, backtrans=TRUE, posterior=FALSE, plot = FALSE)
{

# Required packages
require(coda)
require(rjags)

# Clean data from not needed variables
termsName<-names(priorList)[which(names(priorList) %in% names(inData))]
datatest<-(inData[c(termsName,"N","y")])

# Extract values from prior list
if( length(interaction)>1 ) {
  int = c("0","1e-12","")
  priorList_tmp <- priorList
  priorList_tmp[[length(priorList)+1]] <- int
  names(priorList_tmp)[[length(priorList_tmp)]] <- "int"
  priorVals <- sapply(X = priorList_tmp, FUN = function(inEl) {inEl[1:3]})
} else {
  priorVals <- sapply(X = priorList, FUN = function(inEl) {inEl[1:3]})
  interaction <- c("", "")
  priorList_tmp <- priorList
}

# Create the model structure
modelText <- paste(
  "model",
  "{",

# Set a prior distribution for each included covariate
  gsub("^.*?alpha.coef","alpha",paste("\t", names(priorList_tmp), ".coef ~ dnorm(",
priorVals[1,], ", ", priorVals[2,], ")",priorVals[3,], sep = "", collapse = "\n")),
  "\tfor(i in 1:N)",
  "\t{",

# Build the main model
  gsub(".coef [*] alpha[[i]]","",paste("\t\tmu[i] <- 1/(1+ exp(-(",
  paste(names(priorList), ".coef * ", names(priorList),"[i]",collapse = " + ", sep = "")),paste("+

```

```

", interaction[1],interaction[2],"[i]",sep=""),""))"),
  paste("\t\tty[i] ~ ",respDistr,"( mu[i] )",sep=""),
  "\t}",
  "}\n",
  sep = "\n")

# Add an interaction term if interaction=TRUE
  ifelse(exists("int"),modelText<-
gsub(paste(interaction[1],interaction[2],"[[i]]",sep=""),paste("int.coef
*",interaction[1],"[i]*",interaction[2],"[i]",sep=""),modelText),modelText<-gsub("\s[\\
+]\s[[i]]", "",modelText))

# Print the model specification to the screen
  cat("*** BUGS MODEL SPECIFICATION ***\n")
  cat(modelText)
  cat("*** BUGS MODEL SPECIFICATION ***\n")

# Print the model specification to a temporary file
  cat(modelText, file = modelFile)

# Burn the model in (set the starting values)
  modJAGS <- jags.model(modelFile, data = datatest, n.chains = numChains, n.adapt = burnIn)

# Calculate DIC (Deviance Information Criterion)
  dic<-dic.samples(modJAGS, n.iter = numIters, thin = thinVal, type = "pD")

# Print DIC
  print(dic)

# Run JAGS and draw samples from the posterior
  if( posterior == TRUE)
  {
    ifelse( length(interaction)>1, priorList<-priorList_tmp, priorList<-priorList )

    modOutput <- coda.samples(modJAGS, gsub("alpha.coef","alpha",paste(names(priorList),
".coef", sep = "")), n.iter = numIters, thin = thinVal)

# Gelman plot
  gelman.plot(modOutput)

# Back-transform parameters if interaction=FALSE
  if( interaction[1] == FALSE & backtrans == TRUE ) {
    posterior<-as.data.frame(as.matrix(modOutput))

# Extract chain values
  zb0Sample = posterior[,"alpha"]
  chainLength = length(zb0Sample)
  zbSample = rep(NA,chainLength)
  for (j in names(posterior)[-c(1)]) {
    zbSample = cbind( zbSample, posterior[j])
  }
  zbSample<-zbSample[,-c(1)]

```

```

# Convert back to original scale
  x=orData[termsName]
  y=orData["y"]
  My = mean(as.numeric(y$y))
  SDy = mean(as.numeric(y$y))
  Mx = as.data.frame(as.matrix(lapply(x,mean))[1:length(termsName),1])
  SDx = as.data.frame(as.matrix(lapply(x,sd))[1:length(termsName),1])
  b0Sample = 0 * zb0Sample
  bSample = 0 *zbSample
  for ( stepIdx in 1:chainLength ) {
    b0Sample[stepIdx] = ( zb0Sample[stepIdx]- sum(Mx / SDx *
as.numeric(zbSample[stepIdx,])))
    for ( j in 1:length(termsName)) {
      bSample[stepIdx,j] = zbSample[stepIdx,j] / SDx[j]
    }
  }

# Save the two rescaled parameters into a data frame
  modOutputRescaled<-as.data.frame(cbind(alpha=b0Sample,bSample))
  names(modOutputRescaled)<-gsub(".coef","",names(modOutputRescaled))
}
if (interaction[1] == TRUE & backtrans == TRUE) {
  print(warning("Back-standardization for interaction terms still to be implemented" ))
}

# Plot results
  if(posterior == TRUE & plot == TRUE) {
    X11()
    plot(modOutput, ask=TRUE)
  }

# Save MCMC samples and DIC in the output file
  if( interaction[1] == FALSE & backtrans == TRUE ) {
    return(list(modOutput,modOutputRescaled,dic,Mx,SDx))
  } else {
    return(list(modOutput,dic))
  }
}
}

```
